# Supplementary material for: Pan-Cancer Efficacy of Vemurafenib in BRAF V600-Mutant Non-Melanoma Cancers
Source: Oxford University Press journal article supplement (doi:10.1158/2159-8290.cd-19-1265), 2020-02-06
Supplement: 21598290cd191265-sup-231324_2_supp_6056139_q4vpb0.docx [file 21598290cd191265-sup-231324_2_supp_6056139_q4vpb0.docx]

# Supplementary figures

A


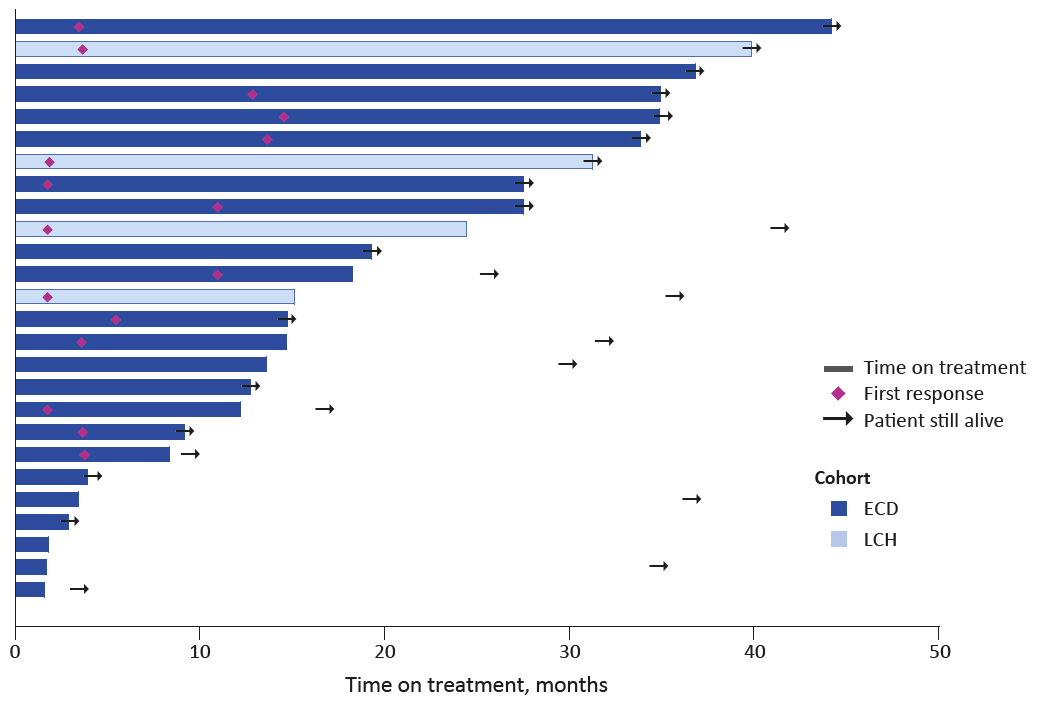


B


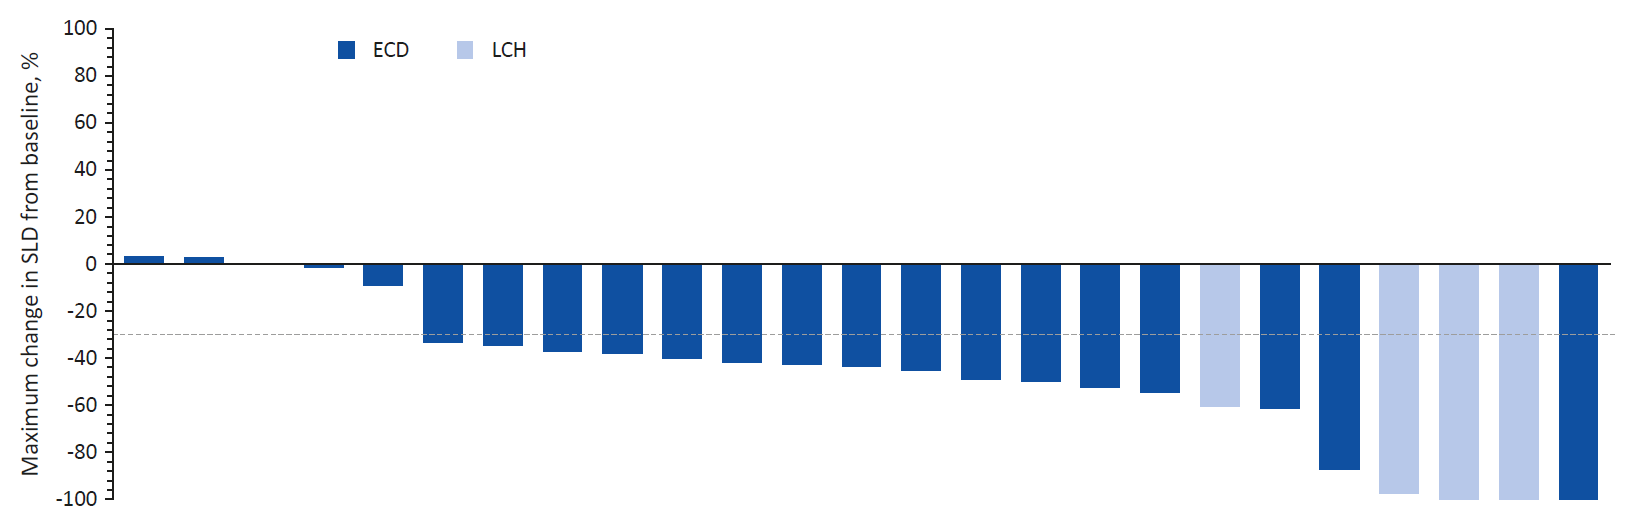


**Supplementary Figure S1. A,** Tumor response to vemurafenib in patients with non-histiocytic tumors. Plot of time on treatment and time to first response, in individual patients. **B,** Waterfall plot of maximum percent decrease from baseline in the sum of diameters of target tumors based on investigator assessment in patients with non-histiocytic tumors and measurable disease. The dashed line at -30% represents the cut-off for RECIST response.

*>100%.

A


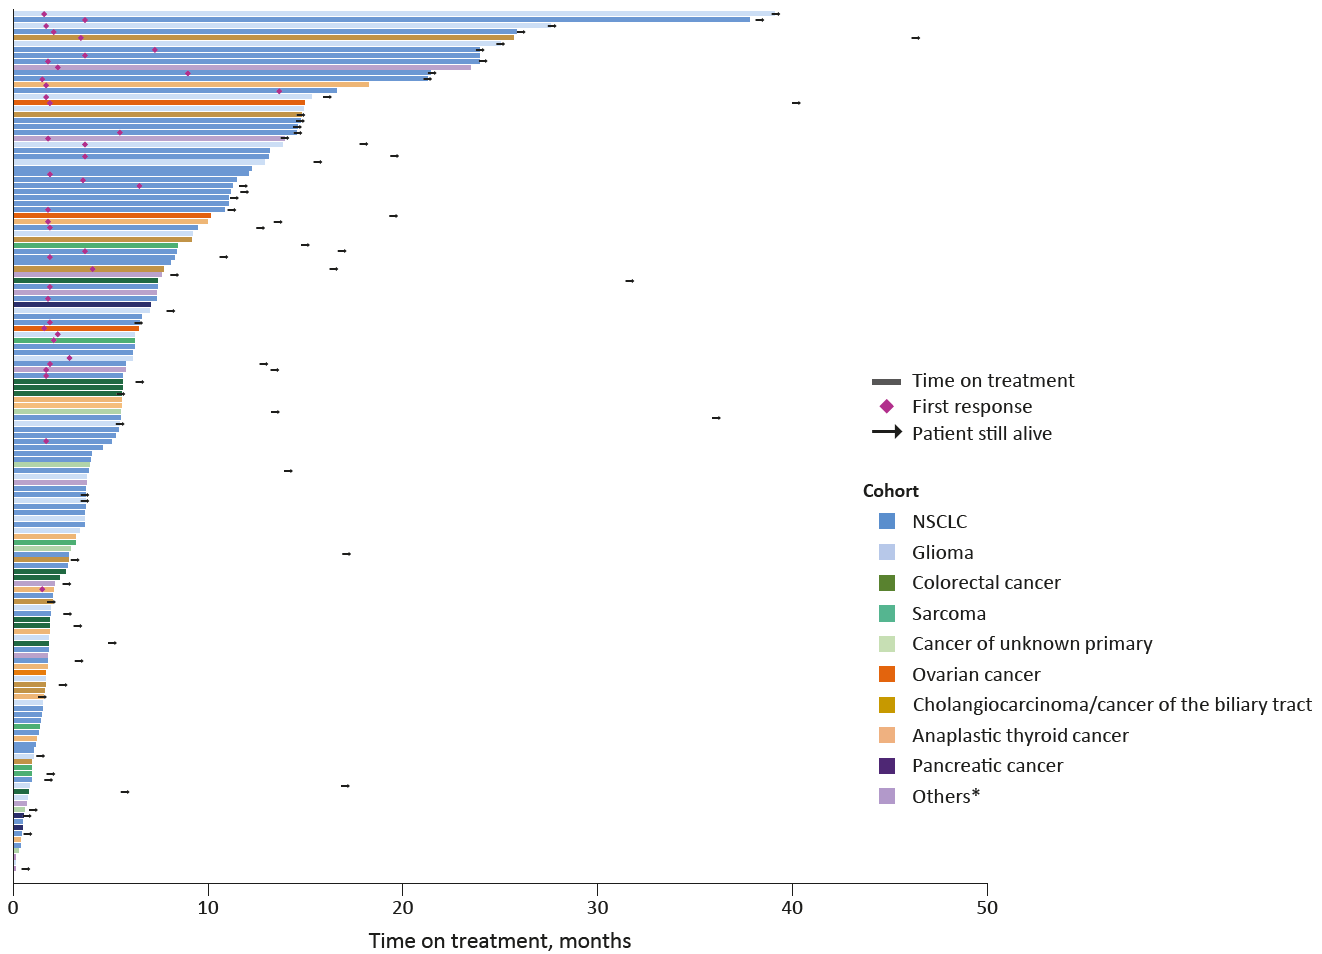


B


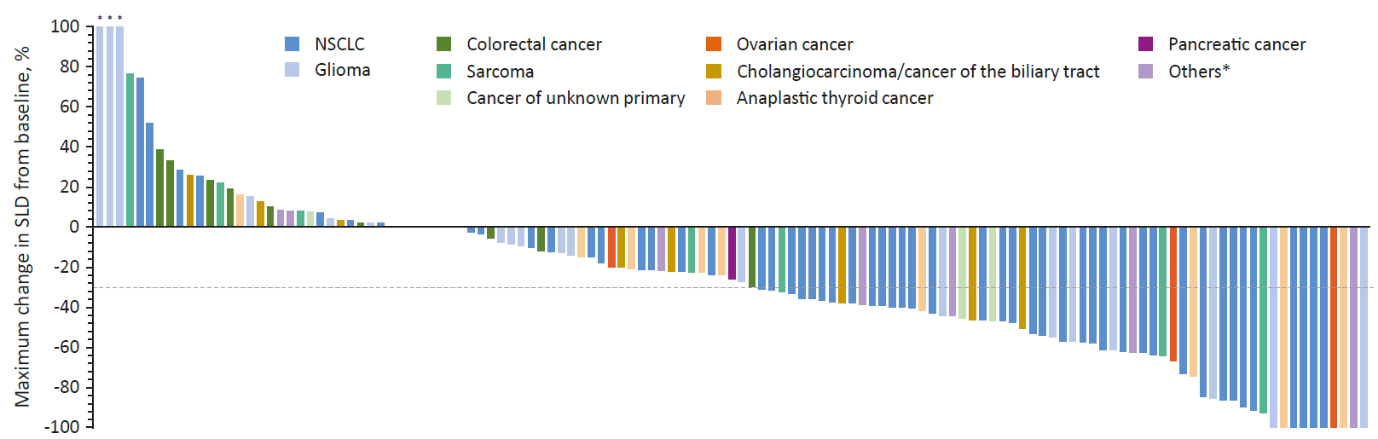


**Supplementary Figure S2. A,** Tumor response to vemurafenib in patients with non-histiocytic tumors. Plot of time on treatment and time to first response, in individual patients. **B,** Waterfall plot of maximum percent decrease from baseline in the sum of diameters of target tumors based on investigator assessment in patients with non-histiocytic tumors and measurable disease. The dashed line at -30% represents the cut-off for RECIST response.

*>100%.
