# Supplementary material for: Pan-Cancer Efficacy of Vemurafenib in BRAF V600-Mutant Non-Melanoma Cancers
Source: Oxford University Press journal article supplement (doi:10.1158/2159-8290.cd-19-1265), 2020-02-06
Supplement: 21598290cd191265-sup-231324_2_supp_6056152_q4vp9p.xlsx [file 21598290cd191265-sup-231324_2_supp_6056152_q4vp9p.xlsx]

## Sheet: Supplementary Table 1_update_an
Sex	Age, y	Prior Systemic Therapies	Baseline ECOG PS	Qualifying Tumor	Histologic Subtype	BRAF Mutation	BRAF Method	OS, mo	Censored for OS	PFS, mo	Censored for PFS	BOR	DOR, mo	Censored for DOR
M	<=47	0	0	ANAPLASIC GANGLIOMA	GANGLIOMA	V600E	Direct (Sanger) sequencing	18	Yes	13.6	No	PR	9.9	No
M	<=47	0	0	ANAPLASTIC EPENDYMOMA	GLYOMA	V600E	Direct (Sanger) sequencing	28.2	No	3.6	No	SD
F	<=47	2	2	ANAPLASTIC GANGLIOGLIOMA	ANAPLASTIC GANGLIOGLIOMA	V600E	SNaPshot	31.6	No	2	No	PD
M	60-71	0	1	ATC	UNDIFFERENTIETED CARCINOMA	V600E	OTHER: ALLELIC DISCRIMINATION	13.6	Yes	10.1	No	PR	8.3	No
M	48-59	1	1	ATC	ANAPLASTIC THYROID CARCINOMA	V600E	OTHER: PCR-BASED DNA SEQUENCING	5.6	Yes	5.5	No	SD
M	60-71	2	1	ATC	ANAPLASTIC	V600E	Sequenom	1.5	Yes	1.3	No	PD
M	60-71	1	0	ATC	PAPILLARY CARCINOMA	V600E	Direct (Sanger) sequencing	3.5	No	2.6	No
F	60-71	1	0	ATC	UNDIFFERENTIATED ANAPLASTIC THYROID CARCINOMA	V600E	Sequenom	32.6	No	32.6	No	CR	31	No
F	>=72	0	2	ATC	UNKNOWN	V600E	ARMS PCR (e.g. Qiagen)	1.3	No	1.3	No	PD
M	60-71	1	0	ATC	UNDIFFERENTIATED (ANAPLASTIC) CARCINOM	V600E	Sequenom	16.8	No	4.4	No	SD
M	>=72	1	2	ATC	ANAPLASTIC	V600E	Sequenom	15.5	No	11.5	No	PR	10	No
M	>=72	1		ATC	ANAPLASTIC AND PAPILLARY	V600E	ARMS PCR (e.g. Qiagen)	4.1	No	3.1	No	SD
M	48-59	1	1	ATC	ANAPLASTIC CARCINOMA	V600E	Sequenom	2.2	No	1.9	No	PD
M	48-59	2	2	ATC	CARCINOMA	V600E	Direct (Sanger) sequencing	0.7	No	0.3	No	PD
F	60-71	1	1	ATC	NA	V600E	OTHER: NEXT GENERATION SEQUENCING	5.9	No	1.8	No	PD
M	>=72	3	2	CARCINOMA OF UNKNOW PRIMARY	MUCINOUS ADENOCARCINOMA	V600E	Direct (Sanger) sequencing	0.4	No	0.4	No
F	<=47	3	2	CERVIX	ADENOCARCINOMA	V600E	Direct (Sanger) sequencing	0.8	No	0.8	No	PD
F	48-59	9	1	Cholangiocarcinoma / Cancer of the Biliary Tract	Adenocarcinoma	V600E	OTHER: NEXT GENERATION SEQUENCING	16.5	Yes	7.7	No	PR	3.6	No
F	60-71	4	1	Cholangiocarcinoma / Cancer of the Biliary Tract	Adenocarcinoma	CODON 600 (EXON15)	Sequenom	2.6	Yes	1.6	No	PD
M	60-71	4	0	Cholangiocarcinoma / Cancer of the Biliary Tract	Adenocarcinoma	V600E	OTHER: NEXT GENERATION SEQUENCING	11.2	No	3	No	SD
F	48-59	1	1	Cholangiocarcinoma / Cancer of the Biliary Tract	Adenocarcinoma	V600E	Direct (Sanger) sequencing	3.2	Yes	3	No	SD
M	48-59	4	0	Cholangiocarcinoma / Cancer of the Biliary Tract	Adenocarcinoma	V600E	OTHER: NEXT GENERATION ON SEQUENCING BY FOUNDATION ONE.	17.9	No	9	No	SD
M	48-59	2	0	Cholangiocarcinoma / Cancer of the Biliary Tract	Adenocarcinoma	V600E	OTHER: NEXT GENERATION SEQUENCING	14.8	Yes	14.8	No	SD
M	<=47	1	1	Cholangiocarcinoma / Cancer of the Biliary Tract	Adenocarcinoma	V600E	ARMS PCR (e.g. Qiagen)	2.6	No	1.6	No	PD
F	<=47	2	0	Cholangiocarcinoma / Cancer of the Biliary Tract	Adenocarcinoma	V600E	OTHER: MULTIPLEX PCR COUPLED WITH A PRIMER EXTENSION ASSAY	46.3	Yes	25.6	No	PR	22.1	No
F	60-71	3	2	Cholangiocarcinoma / Cancer of the Biliary Tract	Adenocarcinoma	V600E	Direct (Sanger) sequencing	1.7	No	0.6	No	PD
M	<=47	4		CLEAR CELL SARCOMA THORACODORSAL RIGHT	CLEARCELL SARKOMA	V600E	Direct (Sanger) sequencing	11.7	No	5.6	No	CR	3.5	No
M	48-59	4	1	Colorectal Cancer	Adenocarcinoma	V600E	OTHER: TEST COBAS 4800 BRAF V600	9.3	No	9.3	No	SD
M	60-71	3	1	Colorectal Cancer	Adenocarcinoma	V600E	OTHER: PCR-BASED DNA SEQUENCING ANALYSIS	3.4	Yes	1.8	No	PD
F	48-59	4	0	Colorectal Cancer	Adenocarcinoma	V600E	Direct (Sanger) sequencing	5.8	Yes	1	No	PD
F	48-59	3	1	Colorectal Cancer	Mucinous Adenocarcinoma	V600E	OTHER: PCR-BASED PRIMER EXTENSION ASSAY	5.1	Yes	1.8	No	PD
F	48-59	2	1	Colorectal Cancer	Adenocarcinoma	V600E	Direct (Sanger) sequencing	31.6	Yes	7.4	No	SD
M	60-71	3		Colorectal Cancer	Mucinous Adenocarcinoma	V600E	Sequenom	12.9	No	5.5	No	SD
M	60-71	4		Colorectal Cancer	Adenocarcinoma	V600E	Sequenom	7.8	No	5.4	No	SD
M	48-59	3		Colorectal Cancer	Adenocarcinoma	V600E	OTHER: COBAS 4800	5.7	No	2.4	No	PD
F	60-71	4		Colorectal Cancer	Mucinous Adenocarcinoma	V600E	Sequenom	8.3	No	1.8	No	PD
F	60-71	2		Colorectal Cancer	Adenocarcinoma	V600E	Sequenom	6.5	Yes	5.5	No	SD
M	<=47	0		ECD	NA	V600E	Sequenom	9.5	Yes	7.6	No	PR	3.8	No
F	<=47	3	1	ECD	NA	V600E	Sequenom	34.9	Yes	5.4	No	SD
M	48-59	2	1	ECD	NA	V600E	Direct (Sanger) sequencing	12.8	Yes	12.8	Yes	SD
F	48-59	1	1	ECD	NA	V600E	OTHER: IMMUNOHISTOCHEMICAL STAIN	25.7	Yes	19.3	Yes	PR	8.3	Yes
F	<=47	1	1	ECD	NA	V600E	ARMS PCR (e.g. Qiagen)	27.6	Yes	27.5	Yes	PR	16.6	Yes
M	48-59	2	1	ECD	NA	V600E	OTHER: LOCKED NUCLEIC ACID (LNA) PROBES	36.7	Yes	3.5	Yes	SD
F	60-71	0	2	ECD	NA	V600E	OTHER: COBAS	27.6	Yes	27.6	Yes	PR	25.9	Yes
M	>=72	3	0	ECD	NA	V600E	Sequenom	8.2	No	8.2	No	SD
F	60-71	1	2	ECD	NA	V600E	Sequenom	44.3	Yes	44.3	Yes	CR	40.7	Yes
M	60-71	2	1	ECD	NA	V600E	OTHER: NEXT GENERATION SEQUENCING	33.9	Yes	33	Yes	PR	19.3	Yes
M	48-59	4	2	ECD	NA	V600E	ARMS PCR (e.g. Qiagen)	3	Yes	1.9	Yes	SD
M	48-59	1	0	ECD	NA	V600E	OTHER: MICROSCOPIC EXAM; PCR-BASED ASSAY	30	Yes	13.8	Yes	SD
M	48-59	0	1	ECD	NA	V600E	OTHER: PCR	9.2	Yes	9.2	Yes	PR	5.6	Yes
M	>=72	2	1	ECD	NA	V600E	Sequenom	36.8	Yes	36.6	Yes	SD
M	48-59	0	1	ECD	NA	V600E	Sequenom	35.1	Yes	35.1	Yes	PR	20.6	Yes
F	>=72	0	1	ECD	NA	V600E	OTHER: PCR	31.9	Yes	14.7	Yes	PR	11.2	Yes
F	48-59	1	0	ECD	NA	V600E	Sequenom	14.8	Yes	14.7	Yes	PR	9.3	Yes
F	>=72	1	2	ECD	NA	V600E	SNaPshot	19.4	Yes	18.4	Yes	SD
F	60-71	2	2	ECD	NA	V600E	OTHER: PCR	35	Yes	35	Yes	PR	22.1	Yes
F	>=72	1	1	ECD	LANGERHANS HISTIOCYTOSIS	V600E	OTHER: FOUNDATIONONE NGS BASED ASSAY	3.5	Yes	0	Yes
M	>=72	0	1	ECD	NA	V600E	Sequenom	4.2	Yes	3.5	Yes	SD
M	48-59	0	0	ECD	NA	V600E	ARMS PCR (e.g. Qiagen)	16.8	Yes	11	Yes	PR	9.3	Yes
M	48-59	4	1	ESOPHAGEAL CANCER	ADENOCARCINOMA	V600 1799T	SNaPshot	3.5	No	1.6	No	PD
F	60-71	3		GASTROINTESTINAL STROMAL SARCOMA	STROMAL SARCOMA	V600E	OTHER: PCR W/ PRIMERS	3.5	No	1.9	No	PD
M	48-59	4	0	HGA	GLIOBLASTOMA	V600E	Sequenom	15.6	Yes	12.9	No	SD
F	<=47	1	0	HGA	RECURRENT HIGH-GRADE LESION WITH ANAPLASTIC FEATURES	V600E	Direct (Sanger) sequencing	17.1	Yes	1.1	No	PD
F	<=47	5	2	HGA	RIGHT TEMPORAL GLIOMA	V600E	OTHER: IMMUNOHISTOCHEMISTRY	9.6	No	9.6	No
M	<=47	1		HGA	XANTRO-ASTROCYTOME PLEOMORPHE	V600E	ARMS PCR (e.g. Qiagen)	2.3	No	1.7	No	PD
F	<=47	2	1	HGA	GLIOBLASTOMA	V600E	Sequenom	8.3	No	3.7	No	SD
F	48-59	1	0	HGA	GLIOBLASTOMA	V600E	Sequenom	3.7	Yes	3.6	Yes	SD
F	<=47	6	1	HGA	JUVENILE PILOCYTIC ASTROCYTOMA	V600E	OTHER: NEXT GENERATION SEQUENCING	16.1	Yes	14.8	No	PR	13.1	No
F	48-59	1	2	HGA	NA	V600E	OTHER: NEXT GENERATION SEQUENCING	1.4	Yes	0	Yes
M	<=47	3	1	HGA	ANAPLASTIC ASTROCYTOMA	V600E	OTHER: PCR-BASED PRIMER EXTENSION ASSAY	40.1	No	14.9	No	SD
F	<=47	1	0	HGA	GLIOBLASTOMA MULTIFORME	V600E	SNaPshot	11.9	No	1.8	No	PD
F	48-59	1	0	HGA	PLEOMORPHIC XANTHOASTROCYTOMA	V600E	Sequenom	27.6	Yes	27.6	Yes	CR	25.9	Yes
M	<=47	1	0	HGA	ANAPLASIC GEMISTOCYTIC ASTROCYTOMA	V600E	OTHER: ARRAY CGH	8.1	Yes	5.6	No	SD
M	<=47	1	0	HISTIOCYTIC SARCOMA	POORLY DIFFERENTIATED	V600E	Sequenom	14	Yes	11.2	Yes	PR	9.4	Yes
F	>=72	0	0	LCH	LYMPHNODE LYMPHADENITIS	V600E	High-resolution melting	39.9	Yes	39	Yes	PR	35.3	Yes
F	>=72	3	1	LCH	NA	V600E	OTHER: RT-PCR	41.4	Yes	41.4	Yes	CR	39.6	Yes
F	60-71	2	1	LCH	NA	V600E	Pyrosequencing	31.3	Yes	31.3	Yes	PR	29.5	Yes
F	<=47	0	0	LCH	NA	V600E	OTHER: PCR	35.7	Yes	14.6	Yes	PR	12.8	Yes
F	48-59	2	1	LGA	ANAPLASTIC ASTROCYTOM	V600E	Direct (Sanger) sequencing	6.8	No	0.9	No	PD
F	<=47	0	0	LGA	ASTROCYTOMA OTHER PLEOMORPHIC XANTHOASTROCYTOMA WITH ANAPLASTIC FEATURES	V600E	Sequenom	5.5	Yes	5.5	No	SD
F	<=47	1		LGA	PILOCYTIC ASTROCYTOMA	V600E	ARMS PCR (e.g. Qiagen)	12.7	No	3.7	No	SD
F	<=47	0	1	LGA	PLEOMORPHIC XANTHOASTROCYTOMA	V600E	Sequenom	39.1	Yes	9.1	No	PR	7.5	No
F	>=72	1	3	LGA	ANAPLASIC GANGLIOMA	V600E	Direct (Sanger) sequencing	0.1	No	0.1	No
F	<=47	0	0	LGA	PLEOMORPHIC XANTHOASTROCYTOMA	V600E	Direct (Sanger) sequencing	5	No	3	No	SD
F	<=47	3	0	LGA	PLEOMORPHIC WITH ANAPLASTIC FEATURES	V600E	ARMS PCR (e.g. Qiagen)	25	Yes	24.8	Yes	SD
F	<=47	0	1	LGA	GLYOMA	V600E	Direct (Sanger) sequencing	6.7	No	5.3	No	PR	2.4	No
F	<=47	1	0	LGA	PLEOMORPHIC XANTHOASTROCYTOMA	V600E	Direct (Sanger) sequencing	15.7	No	5.7	No	PR	3.4	No
F	48-59	2	1	MALIGNANCY OF UNKNOWN PRIMARY	POORLY-DIFFERENTIATED NEOPLASM OF UNKNOWN PRIMARY	V600E	OTHER: NEXT GENERATION SEQUENCING	8.4	No	3.1	No	SD
F	<=47	3	0	METASTATIC CARCINOMA OF UNKNOWN PRIMARY	UNKNOWN	V600E	OTHER: NEXT GENERATION SEQUENCING; NGS; BASED ASSAY	1.1	Yes	0	Yes
F	60-71	10	2	NA	Infiltrating Ductal Carcinoma	V600E	Pyrosequencing	0.4	No	0.4	No
M	60-71	2	1	NASOPHARYNX	SQUAMOUS CELL CARCINOMA	V600E	Sequenom	0.7	Yes	0	Yes
M	60-71	1	1	NEUROENDOCRINE CARCINOMA	CARCINOMA	V600E	OTHER: NEXT GENERATION SEQUENCING	8.3	Yes	7.8	No	SD
M	60-71	1	0	NEUROENDOCRINE CARCINOMA	POOR DIFFERENCIATED NEUROENDOCRINE CARCINOMA	V600E	OTHER: NGS	13.4	Yes	5.7	No	PR	4.1	No
F	>=72	0		NO SMALL CELL CARCINOMA POORLY DIFFERENCIATED	NO SMALL CELL CARCINOMA POORLY DIFFERENCIATED	V600E	ARMS PCR (e.g. Qiagen)	4	No	4	No	SD
F	48-59	1		Non-Small Cell Lung Cancer (NSCLC)	Adenocarcinoma	V600E	SNaPshot	24.1	Yes	21.2	No	PR	19.4	No
M	60-71	2	0	Non-Small Cell Lung Cancer (NSCLC)	Adenocarcinoma	V600E	ARMS PCR (e.g. Qiagen)	6.5	No	6.1	No	SD
F	>=72	1	2	Non-Small Cell Lung Cancer (NSCLC)	Adenocarcinoma	V600E	ARMS PCR (e.g. Qiagen)	19.4	No	19.4	No	PR	5.7	No
M	>=72	0	0	Non-Small Cell Lung Cancer (NSCLC)	Adenocarcinoma	V600E	OTHER: NEXT GENERATION SEQUENCING	11.2	Yes	9	No	PR	7.2	No
F	60-71	2	1	Non-Small Cell Lung Cancer (NSCLC)	Adenocarcinoma	V600E	Pyrosequencing	17.6	No	4.4	No	SD
M	48-59	3	2	Non-Small Cell Lung Cancer (NSCLC)	Adenocarcinoma	V600E	Direct (Sanger) sequencing	13.4	No	7.4	No	PR	5.6	No
M	60-71	0	0	Non-Small Cell Lung Cancer (NSCLC)	Adenocarcinoma	V600E	OTHER: NEXT GENERATION SEQUENCING	6	No	4	No	SD
F	>=72	2	2	Non-Small Cell Lung Cancer (NSCLC)	Adenocarcinoma	V600E	ARMS PCR (e.g. Qiagen)	11.9	Yes	10.9	No	SD
F	48-59	4		Non-Small Cell Lung Cancer (NSCLC)	Adenocarcinoma	V600E	High-resolution melting	2.2	No	1.5	No	PD
M	60-71	1	1	Non-Small Cell Lung Cancer (NSCLC)	Squamous Cell Carcinoma	V600E	OTHER: NEXT GENERATION SEQUENCING; NGS	3.4	Yes	2	No	PD
M	>=72	2	2	Non-Small Cell Lung Cancer (NSCLC)	Adenocarcinoma	V600E	ARMS PCR (e.g. Qiagen)	1.9	No	1.9	No
M	60-71	4	1	Non-Small Cell Lung Cancer (NSCLC)	Adenocarcinoma	V600E	ARMS PCR (e.g. Qiagen)	7.1	No	6.5	No	SD
F	60-71	1	1	Non-Small Cell Lung Cancer (NSCLC)	Adenocarcinoma	V600E	Sequenom	0.6	No	0.6	No
M	60-71	3	1	Non-Small Cell Lung Cancer (NSCLC)	Adenocarcinoma	V600E	OTHER: NEXT GENERATION SEQUENCING	3.7	Yes	3.6	No	SD
M	60-71	1	2	Non-Small Cell Lung Cancer (NSCLC)	Adenocarcinoma	V600E	OTHER: PCR SNP	6.1	No	5.3	No	SD
M	<=47	2	0	Non-Small Cell Lung Cancer (NSCLC)	Adenocarcinoma	V600E	OTHER: HIGHT RESOLUTION MELT PCR	12.7	Yes	8.3	No	PR	6.5	No
F	60-71	0	1	Non-Small Cell Lung Cancer (NSCLC)	Adenocarcinoma	V600E	Sequenom	1.9	Yes	1.9	Yes	SD
M	60-71	1	0	Non-Small Cell Lung Cancer (NSCLC)	Adenocarcinoma	V600E	SNaPshot	25.1	No	10.8	No	SD
F	48-59	2	1	Non-Small Cell Lung Cancer (NSCLC)	Adenocarcinoma	V600E	Direct (Sanger) sequencing	4.8	No	1.8	No	PD
M	60-71	2	2	Non-Small Cell Lung Cancer (NSCLC)	Adenocarcinoma	V600E	High-resolution melting	0.5	No	0.5	No	PD
M	48-59	6	1	Non-Small Cell Lung Cancer (NSCLC)	Adenocarcinoma	V600E	ARMS PCR (e.g. Qiagen)	2	Yes	1.9	Yes	SD
M	>=72	2	0	Non-Small Cell Lung Cancer (NSCLC)	Adenocarcinoma	V600E	SNaPshot	24.6	No	22.1	No	PR	18.4	No
F	48-59	3	1	Non-Small Cell Lung Cancer (NSCLC)	Adenocarcinoma	V600E	Direct (Sanger) sequencing	14.8	Yes	14.8	No	SD
M	>=72	1	1	Non-Small Cell Lung Cancer (NSCLC)	Adenocarcinoma	V600E	ARMS PCR (e.g. Qiagen)	14.1	Yes	3.6	No	SD
F	60-71	1	1	Non-Small Cell Lung Cancer (NSCLC)	Adenocarcinoma	V600E	Direct (Sanger) sequencing	21.9	No	11.2	No	SD
M	60-71	4	1	Non-Small Cell Lung Cancer (NSCLC)	Adenocarcinoma	V600E	ARMS PCR (e.g. Qiagen)	12.9	Yes	5.5	Yes	PR	3.7	Yes
M	60-71	2	0	Non-Small Cell Lung Cancer (NSCLC)	Adenocarcinoma	V600E	OTHER: ONCOCARTA	38.3	Yes	24.9	No	PR	21.3	No
M	>=72	1	1	Non-Small Cell Lung Cancer (NSCLC)	Adenocarcinoma	V600E	ARMS PCR (e.g. Qiagen)	1.7	No	1.2	No	PD
M	48-59	1		Non-Small Cell Lung Cancer (NSCLC)	Adenocarcinoma	V600E	ARMS PCR (e.g. Qiagen)	6.5	Yes	5.9	No	PR	4.1	No
M	48-59	1	1	Non-Small Cell Lung Cancer (NSCLC)	Adenocarcinoma	V600E	Sequenom	9.6	No	5.1	No	PR	3.4	No
M	>=72	2	1	Non-Small Cell Lung Cancer (NSCLC)	Adenocarcinoma	V600E	ARMS PCR (e.g. Qiagen)	22.6	No	9.6	No	PR	6	No
M	60-71	2	1	Non-Small Cell Lung Cancer (NSCLC)	OTHER: MALPHIGIEN CARCINOMA	V600E	ARMS PCR (e.g. Qiagen)	5.7	No	5.7	No
F	60-71	2	1	Non-Small Cell Lung Cancer (NSCLC)	Adenocarcinoma	V600E	Direct (Sanger) sequencing	8.1	No	8.1	No	SD
M	60-71	0	0	Non-Small Cell Lung Cancer (NSCLC)	Squamous Cell Carcinoma	V600E	OTHER: NEXT GENERATION SEQUENCING	26.1	Yes	26	Yes	PR	24	Yes
F	60-71	2	2	Non-Small Cell Lung Cancer (NSCLC)	Adenocarcinoma	V600E	Direct (Sanger) sequencing	14.6	Yes	14.6	No	PR	9.1	No
F	60-71	1	0	Non-Small Cell Lung Cancer (NSCLC)	Adenocarcinoma	V600E	OTHER: NEXT GENERATION SEQUENCING	11.8	Yes	11.3	No	PR	4.8	No
F	>=72	0	1	Non-Small Cell Lung Cancer (NSCLC)	Adenocarcinoma	V600E	Direct (Sanger) sequencing	13.9	No	12.9	No	SD
F	48-59	2	0	Non-Small Cell Lung Cancer (NSCLC)	Adenocarcinoma	V600E	Direct (Sanger) sequencing	10.6	No	1.2	No	PD
F	>=72	0	1	Non-Small Cell Lung Cancer (NSCLC)	Adenocarcinoma	V600E	ARMS PCR (e.g. Qiagen)	19.6	Yes	12.7	Yes	PR	9.1	Yes
F	>=72	1	1	Non-Small Cell Lung Cancer (NSCLC)	Adenocarcinoma	V600E	Sequenom	9.6	No	5.4	No	SD
M	60-71	1	1	Non-Small Cell Lung Cancer (NSCLC)	Adenocarcinoma	V600E	Sequenom	22.8	No	7.3	No	PR	5.5	No
M	48-59	1	1	Non-Small Cell Lung Cancer (NSCLC)	OTHER: HIGH GRADE MALIGNANT NEOPLASM, FAVOR LARGE CELL CARCINOMA WITH RHABDOID FEATURES	V600E	OTHER: NEXT GENERATION SEQUENCING	3.6	No	2.8	No	SD
M	>=72	0		Non-Small Cell Lung Cancer (NSCLC)	Adenocarcinoma	V600E	ARMS PCR (e.g. Qiagen)	4	No	3.6	No	SD
F	60-71	2	0	Non-Small Cell Lung Cancer (NSCLC)	Adenocarcinoma	V600E	OTHER: NEXT GENERATION SEQUENCING	21.5	Yes	21.4	Yes	PR	12.5	Yes
M	48-59	3	0	Non-Small Cell Lung Cancer (NSCLC)	Adenocarcinoma	V600E	Direct (Sanger) sequencing	36	Yes	3.7	No	SD
F	60-71	1	1	Non-Small Cell Lung Cancer (NSCLC)	Adenocarcinoma	V600E	OTHER: FOUNDAION ONE	4.3	No	3.4	No	SD
F	48-59	1	0	Non-Small Cell Lung Cancer (NSCLC)	Adenocarcinoma	V600E	SNaPshot	5	No	3.5	No	SD
M	>=72	2	1	Non-Small Cell Lung Cancer (NSCLC)	Adenocarcinoma	V600E	OTHER: NEXT GENERATION SEQUENCING; NGS	2.8	Yes	1.9	No	PD
F	<=47	1	0	Non-Small Cell Lung Cancer (NSCLC)	Adenocarcinoma	V600E	Sequenom	24	Yes	23.8	Yes	PR	16.6	Yes
M	48-59	1		Non-Small Cell Lung Cancer (NSCLC)	Adenocarcinoma	V600E	ARMS PCR (e.g. Qiagen)	11.4	Yes	10.9	No	SD
M	>=72	4	1	Non-Small Cell Lung Cancer (NSCLC)	Adenocarcinoma	V600	Direct (Sanger) sequencing	15.4	No	9.9	No	PR	8	No
F	>=72	1	2	Non-Small Cell Lung Cancer (NSCLC)	Adenocarcinoma	V600E	Direct (Sanger) sequencing	1.1	No	1.1	No
F	60-71	2	2	Non-Small Cell Lung Cancer (NSCLC)	Adenocarcinoma	V600E	Pyrosequencing	3.2	No	1.8	No	PD
M	60-71	0	1	Non-Small Cell Lung Cancer (NSCLC)	Adenocarcinoma	V600E	OTHER: NEXT GENERATION SEQUENCING	14.6	Yes	13.6	Yes	SD
M	>=72	2	1	Non-Small Cell Lung Cancer (NSCLC)	Adenocarcinoma	V600E	OTHER: NEXT GENERATION SEQUENCING	17.1	Yes	9.7	No	SD
M	60-71	2	0	Non-Small Cell Lung Cancer (NSCLC)	Adenocarcinoma	V600E	ARMS PCR (e.g. Qiagen)	21.3	Yes	20.2	Yes	PR	18.8	Yes
F	>=72	1	2	Non-Small Cell Lung Cancer (NSCLC)	Adenocarcinoma	V600E	OTHER: PCR (ENTROGEN)	0.8	Yes	0.5	Yes	NE
M	60-71	1	1	Non-Small Cell Lung Cancer (NSCLC)	Adenocarcinoma	V600E	Direct (Sanger) sequencing	16.9	Yes	8.4	No	PR	4.7	No
F	>=72	2	1	Non-Small Cell Lung Cancer (NSCLC)	Adenocarcinoma	V600E	ARMS PCR (e.g. Qiagen)	6.8	No	5.9	No	PR	4.3	No
F	60-71	3	1	Non-Small Cell Lung Cancer (NSCLC)	Adenocarcinoma	V600E	ARMS PCR (e.g. Qiagen)	5.7	No	5.2	No	SD
M	>=72	1	1	Non-Small Cell Lung Cancer (NSCLC)	Adenocarcinoma	V600E	ARMS PCR (e.g. Qiagen)	6.1	No	3.6	No	SD
F	48-59	2	0	Non-Small Cell Lung Cancer (NSCLC)	Adenocarcinoma	V600E	Sequenom	10.8	Yes	7.3	No	PR	5.5	No
F	<=47	8	0	Ovarian Cancer	Serous	V600E	Direct (Sanger) sequencing	19.5	Yes	7.4	No	SD
F	48-59	6	1	Ovarian Cancer	Serous	V600E	OTHER: CARIS MOLECULAR INTELLIGENCE	2.6	No	1.9	No	PD
F	<=47	2	1	Ovarian Cancer	Serous	V600E	OTHER: NGS	13	No	5.5	No	PR	3.9	No
F	<=47	3	1	Ovarian Cancer	Serous	V600E	OTHER: CAPILLARY ELECTRPHORESIS SINGLE STRAND CONFIRMATION ANALYSIS	40.1	Yes	14.3	No	PR	12.5	No
F	60-71	1	1	PANCREAS	UNKNOWN	V600E	ARMS PCR (e.g. Qiagen)	0.8	No	0.8	No
F	48-59	3	1	PANCREATIC	ADENOCARCINOMA	V600E	OTHER: TAQMAN BASED ASSAY	17	No	7	No	SD
F	<=47	3	1	PANCREATIC NEUROENDOCRINE TUMOR	WELL-DIFFERENTIATED	V600E	Sequenom	11.6	No	7.3	No	SD
M	48-59	1	2	PANCREATIC TUMOR	PANCREATIC TUMOR	V600E	Direct (Sanger) sequencing	0.8	Yes	0	Yes
M	60-71	2	1	SALIVARY DUCTAL CARCINOMA	SALIVARY DUCT CARCINOMA	V600E	OTHER: NEXT GENERATION SEQUENCING	29.6	No	23.5	No	PR	21.2	No
F	48-59	0	1	SARCOMA	SYNOVIAL SARCOMA	1799T>A (VAL600GLU)	SNaPshot	2	Yes	1.6	No	PD
M	60-71	2	1	SQUAMOUS CELL CARCINOMA	POORLY DIFFERENTIATED CARCINOMA	V600E	OTHER: PCR-BASED DNA SEQUENCING ANALYSIS	2.8	Yes	0.6	No	PD
M	<=47	1	0	SYNOVILOSARCOMA	FUSIFORM CELL	V600E	OTHER: GENOMIC DNA EXTRACTION (MAXWELL 16 PROMEGA)	3.7	No	1.2	No	PD
F	<=47	2	1	UNDIFFERENTIATED SARCOMA	UNDIFFERENTIATED PLEOMORPHIC SARCOMA	V600E	OTHER: NGS	15	Yes	1.7	No	PD
F	48-59	2	1	UNKNOWN	ADENOCARCINOMA	V600E	Sequenom	13.5	Yes	5.6	No	SD
F	>=72	0	1	UNKNOWN, POSSIBLY GASTROINTESTINAL	ADENOCARCINOMA	V600E	Direct (Sanger) sequencing	10.2	No	3.9	No	SD
F	60-71	6	1	UTERINE LEIOMYOSARCOMA	HIGH GRADE	V600E	Sequenom	3.6	No	1	No	PD
Abbreviations: ARMS, amplified refractory mutation system; ATC, anaplastic thyroid cancer; CE-SSCA, capillary electrophoresis single strand confirmation analysis; CGH, comparative genomic hybridization; CUP, carcinoma of unknown primary; ECD, Erdheim–Chester disease; F, female; HGA, high-grade astrocytoma; LCH, Langerhans cell histiocytosis; LGA, low-grade astrocytoma; M, male; NA, not available;…
